# Supplementary material for: Tumoral immune-infiltrate (IF), PD-L1 expression and role of CD8/TIA-1 lymphocytes in localized osteosarcoma patients treated within protocol ISG-OS1
Source: PubMed Central journal article supplement (PMC5762363; doi:10.18632/oncotarget.22912), 2017-12-04
Supplement: oncotarget-08-111836-s001.pdf [file oncotarget-08-111836-s001.pdf]

## Tumoral immune-infiltrate (IF), PD-L1 expression and role of CD8/TIA-1 lymphocytes in localized osteosarcoma patients treated within protocol ISG-OS1

### SUPPLEMENTARY MATERIAL

**Supplementary Table 1: Immunohistochemistry antibody reactivity, sources as well as the antigen retrieval protocols, dilutions and revelation systems**

| antibody     | clone      | origin                  | dilution | antigen retrieval                 | revelation system                 |
|--------------|------------|-------------------------|----------|-----------------------------------|-----------------------------------|
| CD3          | SP7        | Neomarkers              | 1:60     | PT-link EnVision Flex             | Dako Real Detection system        |
| CD8          | 144B       | Dako                    | 1:100    | PT-link EnVision Flex             | Dako Real Detection system        |
| CD20         | L26        | Dako                    | 1:300    | PT-link EnVision Flex             | Dako Real Detection system        |
| FOXP3        | Sp97       | Abnova                  | 1:100    | PT-link EnVision Flex             | Dako Real Detection system        |
| TIA-1        | 2G9        | Immunotech              | 1:300    | PT-link EnVision Flex             | Dako Real Detection system        |
| BDCA-2/CD303 | 124B3.13   | Dendritics              | 1:100    | PT-link EnVision Flex             | Dako Real Detection system        |
| Arginase-1   | polyclonal | GeneTex                 | 1:3200   | PT-link EnVision Flex             | Dako Real Detection system        |
| PD-1         | NAT-1      | Prof. Roncador (Madrid) | 1:4      | PT-link EnVision Flex             | Dako Real Detection system        |
| PD-L1        | SP263      | Ventana, Roche          | RTU      | Ventana Cell Conditioning 1 (CC1) | Ventana OptiView Detection system |
| CD68         | PGM1       | Prof. Falini (Perugia)  | 1:5      | PT-link EnVision Flex             | Dako Real Detection system        |
| CD163        | 10D6       | Leica                   | 1:100    | PT-link EnVision Flex             | Dako Real Detection system        |

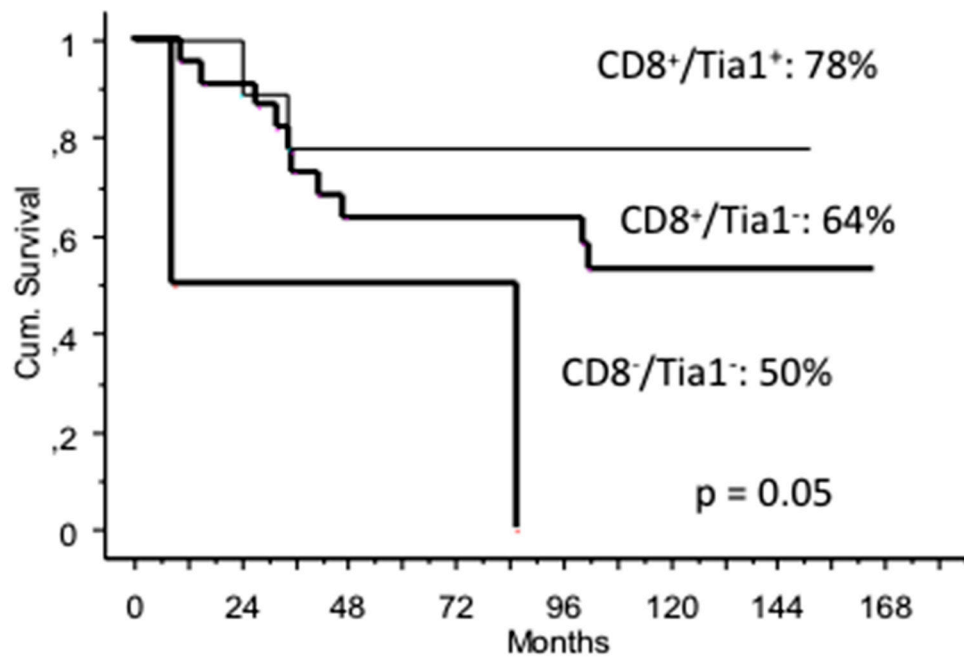

Supplementary Figure 1: 5-year overall survival according to CD8/Tia1 expression after neo-adjuvant chemotherapy in localized osteosarcoma.
